# Supplementary material for: Extreme intraspecific divergence in mitochondrial haplotypes makes the threespine stickleback fish an emerging evolutionary mutant model for mito-nuclear interactions
Source: Front Genet. 2022 Sep 8;13:925786. doi: 10.3389/fgene.2022.925786 (PMC9499175; doi:10.3389/fgene.2022.925786)
Supplement: Supplementary file 7 [file Table1.xlsx]

## Sheet: Table S1. Sequencing Statistics
Table S1. Sample Metadata
Collection Site	Location Coordinates	Sample Code	Availability	Reads
Bear Paw Lake, Alaska	61°36'53.79"N 149°45'23.32"W	AK-TNP1	Ensembl-Ref	N/A
High Ridge Lake, Alaska	61°34'37.52"N ,149°19'48.36" W	AK-ENA3	SAMN30467736	11023071
Limfjord, Denmark	56°36'9.19"N, 8°18'1.94"E	BS25-ENA	SRA-ERR104980	28454
Limfjord, Denmark	56°36'9.19"N, 8°18'1.94"E	BS26-ENA	SRA-ERR104981	49790
Limfjord, Denmark	56°36'9.19"N, 8°18'1.94"E	BS27-ENA	SRA-ERR104982	35994
Limfjord, Denmark	56°36'9.19"N, 8°18'1.94"E	BS28-ENA	SRA-ERR104983	22017
Limfjord, Denmark	56°36'9.19"N, 8°18'1.94"E	BS29-ENA	SRA-ERR104984	24427
Limfjord, Denmark	56°36'9.19"N, 8°18'1.94"E	BS30-ENA	SRA-ERR104985	23357
Akkeshi River, Japan	43° 5' 58.45"N, 144° 52' 54.85"E	JR27-TNP	SRA-DRR032282	51591
Akkeshi River, Japan	43° 5' 58.45"N, 144° 52' 54.85"E	JR39-TNP	SRA-DRR032292	17158
Akkeshi River, Japan	43° 5' 58.45"N, 144° 52' 54.85"E	JR42-TNP	SRA-DRR032298	55658
Akkeshi River, Japan	43° 5' 58.45"N, 144° 52' 54.85"E	JR55-TNP	SRA-DRR032317	4791
Akkeshi River, Japan	43° 5' 58.45"N, 144° 52' 54.85"E	JR58-TNP	SRA-DRR032325	20202
Akkeshi River, Japan	43° 5' 58.45"N, 144° 52' 54.85"E	JR65-TNP	SRA-DRR032332	18559
Cushman Slough, Oregon	43°59’22.4″N 124°2′42.94″W	OR-ENA1	SAMN30467737	623156
Dean Creek, Oregon	43°41'34.36"N 124° 0'1.66"W	OR-ENA2	SAMN30467738	11444706
Dunawi Creek, Oregon	44°32’55.04"N 123°18'9.66"W	OR-ENA3	SAMN30467739	21223901
Eel Creek, Oregon	43°35'13.06"N 124°11'9.96"W	OR-ENA4	SAMN30467740	14793538
Green Island, Oregon	44°8’42.02"N 123° 7'4.88"W	OR-ENA5	SAMN30467741	4364193
Harper Bridge, Oregon	43°51'47.37"N,121°27'07.41"W	OR-ENA6	SAMN30467742	6554819
Leaburg Dam, Oregon	44° 8'14.24"N,122°36'45.95"W	OR-ENA7	SAMN30467743	13929248
Lily Lake, Oregon	44°5’33.69"N 124°06'58.81"W	OR-ENA8	SAMN30467744	9301325
Lynx Hollow, Oregon	43°51’35.07"N 123° 1'24.98"W	OR-ENA9	SAMN30467745	8755265
Middle Fork Willamette River, Oregon	44° 1'29.00"N,122°58'29.49"W	OR-ENA10	SAMN30467746	4840241
Millport Slough, Oregon	44°53′14.68″N 123°59′46.20″W	OR-ENA11	SAMN30467747	2791141
Oxbow (McKenzie), Oregon	44°3’41.29"N 122°51'10.87"W	OR-ENA12	SAMN30467748	13023179
Page Road Umpqua River, Oregon	43°17'2.70"N,123°19'46.66"W	OR-ENA13	SAMN30467749	9250569
Paulina Lake, Oregon	43°42’48.66"N 121°16'21.48"W	OR-ENA14	SAMN30467750	7625900
Pistol Frog Pond, Oregon	42°15'59.76"N,124°22'58.05"W	OR-ENA15	SAMN30467751	9801067
Riverbend, Oregon	44°4’40.97"N 123° 1'34.92"W	OR-ENA16	SAMN30467752	4715885
Sixes River, Oregon*	42°50'31.79"N,124°32'11.76"W 42°48'42.53"N,124°26'35.64"W	OR-ENA17	SAMN30467753	4228354
South Pond Columbia River, Oregon	45°40'41.10"N,122°51'35.38"W	OR-ENA18	SAMN30467754	669285
Sunriver, Oregon	43°53'4.53"N,121°26'41.89"W	OR-ENA19	SAMN30467755	732391
Tyee Slough, Oregon	44°27'52.57"N,123°19'4.96"W	OR-ENA20	SAMN30467756	4696660
Walterville Slough, Oregon	44°4’13.64"N 122°47'54.68"W	OR-ENA21	SAMN30467757	136366
*fish pooled from two collection sites on the Sixes, coordinates for both collection sites are included.
